# Supplementary material for: Signals of Adverse Drug Reactions Communicated by Pharmacovigilance Stakeholders: A Scoping Review of the Global Literature
Source: PubMed Central journal article supplement — Drug Saf. 2022 Dec 5;46(2):109–20. doi: 10.1007/s40264-022-01258-0 (PMC9883307; doi:10.1007/s40264-022-01258-0), 2022-12-05
Supplement: 40264_2022_1258_MOESM3_ESM.pdf [file 40264_2022_1258_MOESM3_ESM.pdf]

# Electronic Supplementary Materials 3: Oxford Centre for Evidence-Based Medicine Levels of Evidence (2011)

Title: Signals of adverse drug reactions communicated by pharmacovigilance stakeholders: a scoping review of the global literature

Submitted to Drug Safety by:

Daniele Sartori <sup>1,2\*</sup> (daniele.sartori@who-umc.org), Jeffrey K Aronson <sup>2</sup>, G Niklas Norén <sup>1</sup>, Igho J Onakpoya <sup>2</sup>

1: Uppsala Monitoring Centre, Bredgränd 7B, 753 20, Uppsala, Sweden

2: Centre for Evidence-Based Medicine, Nuffield Department of Primary Care Health Sciences, University of Oxford, Woodstock Road, Oxford, OX2 6GG, United Kingdom

**Oxford Centre for Evidence-Based Medicine 2011 Levels of Evidence**

| Question                                                              | Step 1<br>(Level 1*)                                                                                                                                                                                            | Step 2<br>(Level 2*)                                                                         | Step 3<br>(Level 3*)                                                                                                                                                                                                  | Step 4<br>(Level 4*)                                                           | Step 5 (Level 5)          |
|-----------------------------------------------------------------------|-----------------------------------------------------------------------------------------------------------------------------------------------------------------------------------------------------------------|----------------------------------------------------------------------------------------------|-----------------------------------------------------------------------------------------------------------------------------------------------------------------------------------------------------------------------|--------------------------------------------------------------------------------|---------------------------|
| <b>How common is the problem?</b>                                     | Local and current random sample surveys (or censuses)                                                                                                                                                           | Systematic review of surveys that allow matching to local circumstances**                    | Local non-random sample**                                                                                                                                                                                             | Case-series**                                                                  | n/a                       |
| <b>Is this diagnostic or monitoring test accurate?</b><br>(Diagnosis) | Systematic review of cross sectional studies with consistently applied reference standard and blinding                                                                                                          | Individual cross sectional studies with consistently applied reference standard and blinding | Non-consecutive studies, or studies without consistently applied reference standards**                                                                                                                                | Case-control studies, or "poor or non-independent reference standard**         | Mechanism-based reasoning |
| <b>What will happen if we do not add a therapy?</b><br>(Prognosis)    | Systematic review of inception cohort studies                                                                                                                                                                   | Inception cohort studies                                                                     | Cohort study or control arm of randomized trial*                                                                                                                                                                      | Case-series or case-control studies, or poor quality prognostic cohort study** | n/a                       |
| <b>Does this intervention help?</b><br>(Treatment Benefits)           | Systematic review of randomized trials or <i>n</i> -of-1 trials                                                                                                                                                 | Randomized trial or observational study with dramatic effect                                 | Non-randomized controlled cohort/follow-up study**                                                                                                                                                                    | Case-series, case-control studies, or historically controlled studies**        | Mechanism-based reasoning |
| <b>What are the COMMON harms?</b><br>(Treatment Harms)                | Systematic review of randomized trials, systematic review of nested case-control studies, <i>n</i> -of-1 trial with the patient you are raising the question about, or observational study with dramatic effect | Individual randomized trial or (exceptionally) observational study with dramatic effect      | Non-randomized controlled cohort/follow-up study (post-marketing surveillance) provided there are sufficient numbers to rule out a common harm. (For long-term harms the duration of follow-up must be sufficient.)** | Case-series, case-control, or historically controlled studies**                | Mechanism-based reasoning |
| <b>What are the RARE harms?</b><br>(Treatment Harms)                  | Systematic review of randomized trials or <i>n</i> -of-1 trial                                                                                                                                                  | Randomized trial or (exceptionally) observational study with dramatic effect                 |                                                                                                                                                                                                                       |                                                                                |                           |
| <b>Is this (early detection) test worthwhile?</b><br>(Screening)      | Systematic review of randomized trials                                                                                                                                                                          | Randomized trial                                                                             | Non-randomized controlled cohort/follow-up study**                                                                                                                                                                    | Case-series, case-control, or historically controlled studies**                | Mechanism-based reasoning |

\* Level may be graded down on the basis of study quality, imprecision, indirectness (study PICO does not match questions PICO), because of inconsistency between studies, or because the absolute effect size is very small; Level may be graded up if there is a large or very large effect size.

\*\* As always, a systematic review is generally better than an individual study.

**How to cite the Levels of Evidence Table**

OCEBM Levels of Evidence Working Group\*. "The Oxford 2011 Levels of Evidence".

Oxford Centre for Evidence-Based Medicine. <http://www.cebm.net/index.aspx?o=5653>

\* OCEBM Table of Evidence Working Group = Jeremy Howick, Iain Chalmers (James Lind Library), Paul Glasziou, Trish Greenhalgh, Carl Heneghan, Alessandro Liberati, Ivan Moschetti, Bob Phillips, Hazel Thornton, Olive Goddard and Mary Hodgkinson
