# Supplementary material for: Signals of Adverse Drug Reactions Communicated by Pharmacovigilance Stakeholders: A Scoping Review of the Global Literature
Source: PubMed Central journal article supplement — Drug Saf. 2022 Dec 5;46(2):109–20. doi: 10.1007/s40264-022-01258-0 (PMC9883307; doi:10.1007/s40264-022-01258-0), 2022-12-05
Supplement: 40264_2022_1258_MOESM4_ESM.pdf [file 40264_2022_1258_MOESM4_ESM.pdf]

# Supplementary Materials 4 – Persistent link to the included and excluded records

Signals of adverse drug reactions communicated by pharmacovigilance stakeholders: a scoping review of the global literature

Submitted to Drug Safety by:

Daniele Sartori<sup>1,2\*</sup> (daniele.sartori@who-umc.org), Jeffrey K Aronson<sup>2</sup>, G Niklas Norén<sup>1</sup>, Igho J Onakpoya<sup>2</sup>

1: Uppsala Monitoring Centre, Bredgränd 7B, 753 20, Uppsala, Sweden

2: Centre for Evidence-Based Medicine, Nuffield Department of Primary Care Health Sciences, University of Oxford, Woodstock Road, Oxford, OX2 6GG, United Kingdom

Given the number of publications we uploaded the complete list of included and excluded records as EndNote compressed library.

Please use

[https://www.dropbox.com/s/yse97mnyt9ewhnu/Additional%20file%204\\_ForUpload.enlx?dl=0](https://www.dropbox.com/s/yse97mnyt9ewhnu/Additional%20file%204_ForUpload.enlx?dl=0) to download the library.

The records are grouped by origin (electronic vs grey literature). Included, grey literature records are further grouped by publishing agency/organization.

To link each record to the charting form, please use the Research Notes column, which includes a unique identifier (See PublicationID in the charting form ESM 5).
